# Supplementary material
Source: Research Square preprint supplement (doi:10.21203/rs.3.rs-10070117/v1)
Supplement: Supplementary file 1 [file 3b1244f883b123320c32f2cf.docx]

**Supporting Information**

**Synergistic Plasmonic and Anion Co-Doping Engineering of TiO₂** **Photoanodes for Efficient N719-Sensitised Quasi-Solid DSSCs**

M. Shiney Manoj1, A. Seema2,V. Ramasubbu3, A Nichelson4, G. Jiji5*, P. Ram Kumar6*

*1Department of Physics, Christian College Kattakada, Thiruvananthapuram 695572, Kerala, India.*

*2Department of Chemistry, Mar Ephraem College of Engineering and Technology. Elavuvilai, Kanyakumari-629172, Tamil Nadu, India.*

*3Department of Physics, National Engineering College, Kovilpatti, Thoothukudi-628 503, India.*

*4Department of Physics, Kalaignarkarunanidhi, Institute of Technology, Coimbatore, 641402, Tamil Nadu, India.*

*5Department of Electronics and Communication Engineering, Lord Jegannath College of Engineering and Technology, Nagercoil, Kanyakumari-629 402, India.*

*6Advanced Materials Lab-Centre of Excellence in Hydrogen Energy Research, Department of Chemistry, Thiagarajar College of Engineering, Madurai-625015, Tamil Nadu, India.*

Corresponding author E-mail: [dr.ramchem93@gmail.com](mailto:dr.ramchem93@gmail)

**Figure S1.** Deconvoluted FT-IR spectra of the low-wavenumber vibrational region for (a) TiON₀.₅S₀.₂₅ and (b) Ag-loaded TiON₀.₅S₀.₂₅ composites. The fitted components centered near ~650–700 cm⁻¹ correspond to Ti–O–Ti and Ti–O–N/Ti–O–S lattice vibrations, while the lower wavenumber contribution near ~520–530 cm⁻¹ is associated with Ag–O surface interactions, confirming enhanced interfacial coupling and structural distortion after Ag incorporation.

**Figure S2**. XPS survey and high-resolution spectra of TiON₀.₅S₀.₂₅ showing the Ti 2p, O 1s, N 1s, and S 2p regions, confirming successful N and S incorporation into the TiO₂ framework.

**Figure S3.** Particle size distribution histograms of (a) TiON₀.₅S₀.₂₅, (b) Ag(0.6%)/TiON₀.₅S₀.₂₅, (c) Ag(1.9%)/TiON₀.₅S₀.₂₅, and (d) Ag(3.1%)/TiON₀.₅S₀.₂₅ composites derived from FESEM analysis. The average particle size gradually increases from approximately 18 to 25 nm with increasing Ag loading.

**Figure S4.** EDS spectra of TiON₀.₅S₀.₂₅ and Ag(x%)/TiON₀.₅S₀.₂₅ composites confirming the presence of Ti, O, N, S, and Ag elements. The increasing Ag peak intensity with increasing loading concentration confirms successful incorporation of plasmonic Ag nanoparticles.
